# Supplementary material for: Tissue-specific impacts of aging and genetics on gene expression patterns in humans
Source: PubMed Central journal article supplement (PMC9530233; doi:10.1038/s41467-022-33509-0), 2022-10-03
Supplement: 41467_2022_33509_MOESM2_ESM.pdf [file 41467_2022_33509_MOESM2_ESM.pdf]

## **Description of Additional Supplementary Files**

File Name: Supplementary Data 1

Description: Number of individuals in "old" and "young" cohorts

File Name: Supplementary Data 2

Description: Names of GTEx tissues with matching abbreviations used within figures

File Name: Supplementary Data 3

Description: Genes with significant age-related gene expression heteroscedasticity

File Name: Supplementary Data 4

Description: Genes with nonzero age-sex interaction term

File Name: Supplementary Data 5

Description: GO enrichment of  $R^2$  of age across all tissues

File Name: Supplementary Data 6

Description: Tissues with matching COSMIC query and number of sequenced tumor samples

.
